# Supplementary material for: Photoluminescence and electroluminescence of an iridium(iii) complex with 2′,6′-bis(trifluoromethyl)-2,4′-bipyridine and 2-(5-phenyl-1,3,4-thiadiazol-2-yl)phenol ligands
Source: Royal Society of Chemistry journal article supplement (doi:10.1039/c7nj00163k), 2017-01-01
Supplement: c7nj00163k1.pdf [file c7nj00163k1.pdf]

## Supplementary Information

### Photoluminescence and electroluminescence of an iridium(III) complex with 2',6'-bis(trifluoromethyl)-2,4'-bipyridine and 2-(5-phenyl-1,3,4-thiadiazol-2-yl)phenol ligands

Yi-Ming Jing<sup>a</sup>, You-Xuan Zheng<sup>a,b\*</sup>

<sup>a</sup> State Key Laboratory of Coordination Chemistry, Jiangsu Key Laboratory of Advanced Organic Materials, Collaborative Innovation Center of Advanced Microstructures, School of Chemistry and Chemical Engineering, Nanjing University, Nanjing 210093, P. R. China, e-mail: yxzheng@nju.edu.cn

<sup>b</sup> MaAnShan High-Tech Research Institute of Nanjing University, MaAnShan, 238200, P. R. China

**Table S1.** Parameters associated with the single crystal diffraction data collection for **Ir(BTBP)<sub>2</sub>TDZ**.

|                                                                                                                                     | <b>Ir(BTBP)<sub>2</sub>TDZ</b>                                      |
|-------------------------------------------------------------------------------------------------------------------------------------|---------------------------------------------------------------------|
| Formula                                                                                                                             | C <sub>38</sub> H <sub>19</sub> F <sub>12</sub> IrN <sub>6</sub> OS |
| Formula weight                                                                                                                      | 1027.85                                                             |
| T (K)                                                                                                                               | 296(2)                                                              |
| Wavelength (Å)                                                                                                                      | 0.71073                                                             |
| Crystal system                                                                                                                      | Monoclinic                                                          |
| Space group                                                                                                                         | <i>P</i> 2 <sub>1</sub> / <i>n</i>                                  |
| <i>a</i> (Å)                                                                                                                        | 10.5833(4)                                                          |
| <i>b</i> (Å)                                                                                                                        | 24.6297(8)                                                          |
| <i>c</i> (Å)                                                                                                                        | 15.5661(5)                                                          |
| $\alpha$ (deg)                                                                                                                      | 90.00                                                               |
| $\beta$ (deg)                                                                                                                       | 102.3490(10)                                                        |
| $\gamma$ (deg)                                                                                                                      | 90.00                                                               |
| <i>V</i> (Å <sup>3</sup> )                                                                                                          | 3963.6(2)                                                           |
| <i>Z</i>                                                                                                                            | 4                                                                   |
| $\rho_{\text{calcd}}$ (g/cm <sup>3</sup> )                                                                                          | 1.722                                                               |
| $\mu$ (Mo K $\alpha$ ) (mm <sup>-1</sup> )                                                                                          | 3.517                                                               |
| <i>F</i> (000)                                                                                                                      | 1992                                                                |
| Range of transm factors (deg)                                                                                                       | 1.574-25.009                                                        |
| Reflns collected                                                                                                                    | 22135                                                               |
| Unique( <i>R</i> <sub>int</sub> )                                                                                                   | 6990(0.0304)                                                        |
| <i>R</i> <sub><i>I</i></sub> <sup><i>a</i></sup> , <i>wR</i> <sub>2</sub> <sup><i>b</i></sup> [ <i>I</i> > 2 <i>s</i> ( <i>I</i> )] | 0.0286, 0.0686                                                      |
| <i>R</i> <sub><i>I</i></sub> <sup><i>a</i></sup> , <i>wR</i> <sub>2</sub> <sup><i>b</i></sup> (all data)                            | 0.0358, 0.0707                                                      |
| GOF on <i>F</i> <sup>2</sup>                                                                                                        | 1.057                                                               |
| CCDC number                                                                                                                         | 1524694                                                             |

$$R_I^a = \frac{\sum ||F_o| - |F_c||}{\sum F_o}, \quad wR_2^b = \left[ \frac{\sum w(F_o^2 - F_c^2)^2}{\sum w(F_o^2)} \right]^{1/2}$$

$$\text{GOF} = \left[ \frac{\sum w|F_o| - |F_c|}{\sum w|F_o|} \right]^2 / (N_{\text{obs}} - N_{\text{param}})^{1/2}$$

**Table S2.** The table of selected bond lengths and angles of **Ir(BTBP)<sub>2</sub>TDZ**.

| Selected Bond | Bond Length (Å) | Selected Angle   | Bond Angle (°) |
|---------------|-----------------|------------------|----------------|
| Ir(1)-C(1)    | 2.022(4)        | C(22)-Ir(1)-C(1) | 99.02 (16)     |
| Ir(1)-C(22)   | 2.020(4)        | C(22)-Ir(1)-N(3) | 80.46 (17)     |
| Ir(1)-N(3)    | 2.032(3)        | C(1)-Ir(1)-N(3)  | 101.88 (15)    |
| Ir(1)-N(2)    | 2.049(3)        | C(22)-Ir(1)-N(2) | 105.59 (16)    |
| Ir(1)-N(1)    | 2.125(3)        | C(1)-Ir(1)-N(2)  | 80.94 (14)     |
| Ir(1)-O(1)    | 2.110(3)        | N(3)-Ir(1)-N(2)  | 172.96 (13)    |
|               |                 | C(22)-Ir(1)-N(1) | 90.94 (15)     |
|               |                 | C(1)-Ir(1)-N(1)  | 168.81 (14)    |
|               |                 | N(3)-Ir(1)-N(1)  | 84.70 (13)     |
|               |                 | N(2)-Ir(1)-N(1)  | 91.53 (12)     |
|               |                 | C(22)-Ir(1)-O(1) | 171.25 (14)    |
|               |                 | C(1)-Ir(1)-O(1)  | 85.61 (14)     |
|               |                 | N(3)-Ir(1)-O(1)  | 91.35 (13)     |
|               |                 | N(2)-Ir(1)-O(1)  | 82.40 (12)     |
|               |                 | N(1)-Ir(1)-O(1)  | 85.20 (12)     |

**Table S3.** Electrochemical data of **Ir(BTBP)<sub>2</sub>TDZ**.

| Complex                        | $E_{ox}$ (V) <sup>a)</sup> | $E_{red}$ (V) | HOMO (eV) <sup>b)</sup> | LUMO (eV) | $E_g$ (eV) |
|--------------------------------|----------------------------|---------------|-------------------------|-----------|------------|
| <b>Ir(BTBP)<sub>2</sub>TDZ</b> | 0.93                       | -1.42         | -5.58                   | -3.04     | 2.54       |

<sup>a)</sup> Oxidation potential measured in solution at 0.05 mV/s.

<sup>b)</sup> The HOMO energy levels were calculated from the equation: HOMO (eV) =  $E_{ox} - E_{Fc^+/Fc}^+ + 4.8$ .

**Table S4.** Percentage distributions of HOMO and LUMO in **Ir(BTBP)<sub>2</sub>TDZ**.

| Complex                        | Orbital | Energy/eV<br>(Calculated) | $E_{gap}$ /eV<br>(Calculated) | Composition (%) |       |       |
|--------------------------------|---------|---------------------------|-------------------------------|-----------------|-------|-------|
|                                |         |                           |                               | Ir              | BTBP  | TDZ   |
| <b>Ir(BTBP)<sub>2</sub>TDZ</b> | HOMO    | -5.493                    | 3.301                         | 14.73           | 5.31  | 79.96 |
|                                | LUMO    | -2.192                    |                               | 1.39            | 41.77 | 56.84 |
